# Supplementary material
Source: HighWire-hosted journal article supplement (https://jnm.snmjournals.org/highwire/filestream/110332/field_highwire_adjunct_files/0/263889_Supplemental_Data.pdf)
Supplement: 263889_Supplemental_Data.pdf [file 263889_Supplemental_Data.pdf]

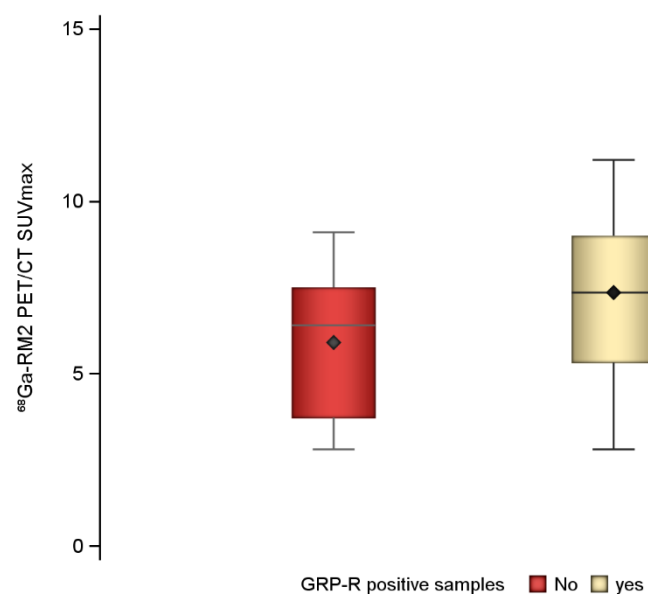

Supplemental figure 1. Association of GRP-R immunohistochemistry and  $^{68}\text{Ga}$ -RM2 PET/CT SUVmax. Median  $^{68}\text{Ga}$ -RM2 SUVmax was 6.40 in samples low for GRP-R vs 7.35 for samples positive for GRP-R ( $p=0.50$ ).

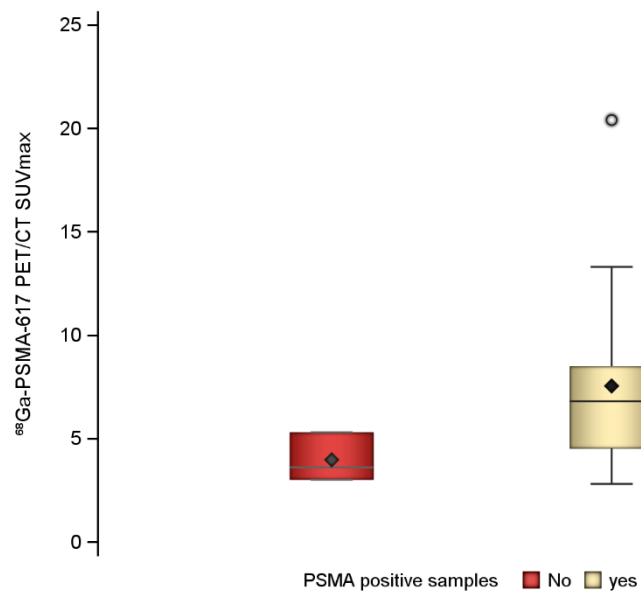

Supplemental figure 2. Association of GRP-R immunohistochemistry and  $^{68}\text{Ga}$ -PSMA-617 PET/CT SUVmax. Median  $^{68}\text{Ga}$ -PSMA-617 SUVmax was 3.60 for PSMA-low samples and 6.80 for PSMA-positive samples (p=0.12).
